# Supplementary material for: Survival Analysis in Patients with Lung Cancer and Subsequent Primary Cancer: A Nationwide Cancer Registry Study
Source: MDPI journal article supplement (doi:10.3390/jcm11195944), 2022-10-08
Supplement: s1 [file s1]

**Table S1.** Mean survival time of single and second primary malignancy.

| Characteristics                  |                         | Single lung cancer | LCF          | P      |
|----------------------------------|-------------------------|--------------------|--------------|--------|
| Mean, std                        |                         |                    |              |        |
| Stage of lung cancer             | 0                       | 4.333(1.372)       | 4.373(2.061) | 0.8407 |
|                                  | 1                       | 4.824(2.014)       | 4.762(1.985) | 0.3277 |
|                                  | 2                       | 3.501(2.401)       | 4.077(2.391) | 0.0002 |
|                                  | 3                       | 2.227(2.142)       | 2.965(2.274) | <0.001 |
|                                  | 4                       | 1.352(1.551)       | 1.802(1.780) | <0.001 |
| Hx of smoking                    | Yes                     | 1.751(2.012)       | 2.791(2.333) | <0.001 |
|                                  | No                      | 2.790(2.326)       | 3.888(2.322) | <0.001 |
|                                  | Unknown                 | 1.738(1.987)       | 2.427(2.234) | <0.001 |
| Hx of alcohol drinking           | Yes                     | 1.937(2.129)       | 3.064(2.432) | <0.001 |
|                                  | No                      | 2.426(2.277)       | 3.573(2.371) | <0.001 |
|                                  | Unknown                 | 1.738(1.987)       | 2.427(2.234) | <0.001 |
| Histological type of lung cancer | Adenocarcinoma          | 2.631(2.261)       | 3.770(2.293) | <0.001 |
|                                  | Squamous cell carcinoma | 1.562(1.909)       | 2.572(2.345) | <0.001 |
|                                  | Small cell              | 0.965(1.355)       | 1.475(1.675) | <0.001 |
|                                  | Others                  | 1.564(2.223)       | 2.461(2.416) | <0.001 |

AC: Adenocarcinoma; SCC: Squamous cell carcinoma.

**Table S2.** Univariate and multivariate regression analysis of overall survival among single lung cancer and lung cancer first patients.

| Characteristics                  |                | Total Population |       | Univariate analysis |        | Multivariate analysis |        |
|----------------------------------|----------------|------------------|-------|---------------------|--------|-----------------------|--------|
|                                  |                | N                | %     | HR (95%CI)          | P      | HR (95%CI)            | P      |
| Group                            | LCF            | 3728             | 5.70  | 1                   |        | 1                     |        |
|                                  | Single Lung    | 61642            | 94.30 | 1.60(1.54-1.67)     | <0.001 | 1.19(1.14-1.24)       | <0.001 |
|                                  |                |                  |       |                     |        |                       |        |
| Age                              | <65            | 27960            | 42.77 | 1                   | <0.001 | 1                     | <0.001 |
|                                  | >65            | 37410            | 57.23 | 1.91(1.88-1.95)     |        | 1.64(1.61-1.67)       |        |
| Gender                           | Female         | 26867            | 41.10 | 1                   | <0.001 | 1                     | <0.001 |
|                                  | Male           | 38503            | 58.90 | 1.74(1.71-1.77)     |        | 1.29(1.26-1.32)       |        |
| Hx of smoking                    | No             | 29747            | 45.51 | 1                   |        | 1                     |        |
|                                  | Yes            | 25354            | 38.79 | 1.82(1.78-1.85)     | <0.001 | 1.13(1.10-1.16)       | <0.001 |
|                                  | Unknown        | 10269            | 15.71 | 1.91(1.86-1.96)     |        | 1.38(1.30-1.46)       |        |
| Hx of alcohol drinking           | No             | 41705            | 63.80 | 1                   |        | 1                     |        |
|                                  | Yes            | 11734            | 17.95 | 1.34(1.31-1.37)     | <0.001 | 1.00 (0.98-1.03)      | <0.001 |
|                                  | Unknown        | 10379            | 15.88 | 1.51(1.48-1.55)     |        | 0.89(0.85-0.94)       |        |
| Stage of lung cancer             | 1              | 11126            | 17.02 | 1                   |        | 1                     |        |
|                                  | 0              | 697              | 1.07  | 0.41 (0.31-0.53)    |        | 0.52(0.40-0.68)       |        |
|                                  | 2              | 2854             | 4.37  | 3.56(3.34-3.79)     | <0.001 | 2.26(2.12-2.41)       | <0.001 |
|                                  | 3              | 9347             | 14.40 | 7.16 (6.84-7.51)    |        | 3.34(3.17-3.51)       |        |
|                                  | 4              | 35659            | 54.55 | 12.24(11.73-12.77)  |        | 6.39(6.09-6.72)       |        |
|                                  | Unknown        | 5687             | 8.70  | 7.74(7.36-8.14)     |        | 3.36(3.18-3.56)       |        |
| Histological type of lung cancer | EAC            | 43839            | 67.06 | 1                   |        | 1                     |        |
|                                  | SCC            | 9703             | 14.84 | 1.88(1.83-1.92)     | <0.001 | 1.32(1.28-1.36)       | <0.001 |
|                                  | Small cell     | 6510             | 9.96  | 2.85(2.77-2.93)     |        | 1.49(1.45-1.54)       |        |
|                                  | Others         | 5318             | 8.14  | 1.93(1.87-1.99)     |        | 1.51(1.46-1.57)       |        |
| EGFR                             | Non-detected   | 11735            | 17.95 | 1                   | <0.001 | 1                     | <0.001 |
|                                  | Mutant         | 15925            | 24.36 | 0.67(0.65-0.68)     |        | 0.62(0.60-0.64)       |        |
|                                  | Unknown        | 37710            | 57.69 | 0.81(0.79-0.83)     |        | 0.96(0.93-0.99)       |        |
| Operation                        | No             | 48016            | 73.45 | 1                   |        | 1                     |        |
|                                  | Lobectomy      | 17264            | 26.41 | 0.14(0.13-0.14)     | <0.001 | 0.36(0.35-0.38)       | <0.001 |
|                                  | Pneumone ctomy | 90               | 0.14  | 0.28(0.22-0.38)     |        | 0.47(0.36-0.62)       |        |

AC: Adenocarcinoma; SCC: Squamous cell carcinoma.
